# Supplementary material
Source: publisher site journal article supplement (https://www.dovepress.com/article/278736)
Supplement: Supplementary file 1 [file get_supplementary_file.php]

## Supplementary materials

**Table S1. Clinicopathological features of the 170 pancreatic tumor patients**

|  | **Total** | **CD26 positive** | **CD26 negative** |
| --- | --- | --- | --- |
| **Patients (n)** | 170 | 135 | 35 |
| **Gender (male/female)** | 81/89 | 61/74 | 20/15 |
| **Age (years)** | 55.9±15.6 | 55.6±15.5 | 57.3±16.2 |
| **Smoking (deny/present) *** | 128/41 | 103/31 | 25/10 |
| **Drinking (deny/present) *** | 136/33 | 109/25 | 27/8 |
| **Abnormal glucose (absent/present) *** | 128/41 | 100/34 | 28/7 |
| **Blood type (A/B/AB/O) *** | 64/38/19/46 | 54/28/18/32 | 10/10/1/14 |
| **Tumor site (head/body&tail/whole)** | 82/85/3 | 65/67/3 | 17/18/0 |
| **Tumor size (cm)** | 4.3±2.4 | 4.3±2.3 | 4.3±2.8 |
| **Pathological classification [n (%)]** |  |  |  |
| Ductal adenocarcinoma and variants | 109(64.1) | 90(66.7) | 19(54.3) |
| Solid-pseudopapillary neoplasms | 28(16.5) | 22(16.3) | 6(17.1) |
| Neuroendocrine neoplasms | 18(10.6) | 15(11.1) | 3(8.6) |
| Mucinous cystic neoplasms | 2(1.2) | 1(0.7) | 1(2.9) |
| Serous neoplasms | 3(1.8) | 3(2.2) | 0(0) |
| IPMNs | 3(1.8) | 1(0.7) | 2(5.7) |
| Pancreatitis | 3(1.8) | 1(0.7) | 2(5.7) |
| Acinar cell neoplasms | 1(0.6) | 0(0) | 1(2.9) |
| Secondary pancreatic metastasis | 3(1.8) | 2(1.5) | 1(2.9) |
| **CEA（ng/ml）[median(range)]** | 2.6(0.3-255.2) | 2.5(0.3-255.2) | 2.7(0.4-106.6) |
| **CA199（U/ml）[median(range)]** | 80.0(0-9906.0) | 83.2(0.0-9906.0) | 66.0(0.0-4206.0) |
| **CA72.4（U/ml）[median(range)]** | 2.1(0.2-67.6) | 2.4(0.2-67.6) | 1.8(0.4-25.9) |
| **CA242（U/ml）[median(range)]** | 16.3(1.0-339.1) | 19.1(1.0-339.1) | 13.0(1.0-337.5) |

* Clinicopathological data of several patients were incomplete, yet do not affect the overall results

**Table S2. Correlation between CD26 expression and clinicopathological features (enumeration data) in 161 malignant pancreatic-tumor patients**

| **Characteristics** | **CD26 high expression** | **CD26 low expression** | ***P* value** |
| --- | --- | --- | --- |
| **Gender** |  |  |  |
| Male | 47 | 38 | 0.174 |
| Female | 50 | 26 |  |
| **Smoking*** |  |  |  |
| Deny | 70 | 52 | 0.132 |
| Present | 27 | 11 |  |
| **Drinking*** |  |  |  |
| Deny | 77 | 51 | 0.808 |
| Present | 20 | 12 |  |
| **Abnormal blood glucose*** |  |  |  |
| Absent | 73 | 50 | 0.547 |
| Present | 24 | 13 |  |
| **Blood type*** |  |  |  |
| A type | 39 | 23 | 0.052 |
| B type | 18 | 16 |  |
| AB type | 16 | 3 |  |
| O type | 21 | 22 |  |
| **Tumor site** |  |  |  |
| Head | 46 | 32 | 0.213 |
| Body and tail | 48 | 32 |  |
| Whole pancreas | 3 | 0 |  |
| **Pathological type** |  |  |  |
| Low-grade malignant tumor | 9 | 19 | 0.001 |
| High-grade malignant tumor | 88 | 45 |  |
| **Blood vessel invasion*** |  |  |  |
| Absent | 51 | 33 | 0.600 |
| Present | 39 | 21 |  |
| **Tumor invasion*** |  |  |  |
| T1 | 11 | 14 | 0.317 |
| T2 | 49 | 25 |  |
| T3 | 29 | 15 |  |
| T4 | 3 | 1 |  |
| Secondary pancreatic metastases | 3 | 1 |  |
| **Lymph node metastasis*** |  |  |  |
| N0 | 43 | 33 | 0.444 |
| N1+N2 | 46 | 24 |  |
| Secondary pancreatic metastases | 3 | 1 |  |
| **Metastasis*** |  |  |  |
| M0 | 80 | 59 | 0.246 |
| M1 | 13 | 4 |  |
| Secondary pancreatic metastases | 3 | 1 |  |
| **Tumor stage*** |  |  |  |
| Ⅰ+Ⅱ | 65 | 42 | 0.451 |
| Ⅲ+Ⅳ | 23 | 9 |  |
| Secondary pancreatic metastases | 3 | 1 |  |

* Clinicopathological data of several patients were incomplete, yet this does not affect the overall results

**Table S3. Correlation between CD26 expression and clinicopathological features (measurement data) in 161 malignant pancreatic-tumor patients**

|  | **Correlation of coefficient with CD26 expression** | ***P* value** |
| --- | --- | --- |
| **Age** | 0.151 | 0.056 |
| **Size** | -0.055 | 0.490 |
| **CEA** | 0.115 | 0.174 |
| **CA199** | 0.207 | 0.013 |
| **CA72.4** | 0.080 | 0.351 |
| **CA242** | 0.206 | 0.025 |
| **Disease-free survival time (months)** | -0.348 | ＜0.001 |
| **Overall survival time (months)** | -0.310 | ＜0.001 |

**Table S4. Cox proportional hazard regression model analysis of disease-free survival in 161 malignant pancreatic cancer patients**

| **Characteristics** | **Univariate analysis** | | | **Multivariate analysis** | | |
| --- | --- | --- | --- | --- | --- | --- |
| *P* value | Hazard Ratio | 95% confidence interval | *P* value | Hazard Ratio | 95% confidence interval |
| **Gender** | 0.765 | 0.907 | 0.479-1.717 |  |  |  |
| **Age (years)** | 0.267 | 1.012 | 0.991 -1.034 |  |  |  |
| **Smoking** | 0.879 | 1.060 | 0.501-2.242 |  |  |  |
| **Drinking** | 0.632 | 1.201 | 0.568-2.543 |  |  |  |
| **Abnormal blood glucose** | 0.801 | 0.904 | 0.414-1.976 |  |  |  |
| **Blood type** | 0.091 | 2.125 | 0.887-5.091 |  |  |  |
| **Size (cm)** | 0.848 | 1.013 | 0.887-1.157 |  |  |  |
| **Pathological type** | 0.048 | 4.259 | 1.015-17.879 | 0.662 | 1.388 | 0.320-6.022 |
| **Blood vessel invasion** | 0.068 | 1.827 | 0.956-3.493 |  |  |  |
| **Tumor invasion** | 0.070 | 1.842 | 0.952-3.566 |  |  |  |
| **Lymph node metastasis** | 0.162 | 1.596 | 0.828-3.076 |  |  |  |
| **Metastasis** | ＜0.001 | 194.821 | 42.064-902.316 |  |  |  |
| **Tumor stage** | ＜0.001 | 10.842 | 5.360-21.929 | ＜0.001 | 10.558 | 5.156-21.622 |
| **CD26 level** | 0.055 | 1.973 | 0.987-3.944 | 0.163 | 1.651 | 0.816-3.341 |

**Table S5. Cox proportional hazard regression model analysis of disease-free survival in PDAC patients**

| **Characteristics** | **Univariate analysis** | | | **Multivariate analysis** | | |
| --- | --- | --- | --- | --- | --- | --- |
| *P* value | Hazard Ratio | 95% confidence interval | *P* value | Hazard Ratio | 95% confidence interval |
| **Gender** | 0.450 | 0.760 | 0.373-1.548 |  |  |  |
| **Age (years)** | 0.213 | 0.979 | 0.946-1.012 |  |  |  |
| **Smoking** | 0.888 | 0.946 | 0.435-2.056 |  |  |  |
| **Drinking** | 0.949 | 1.026 | 0.471-2.231 |  |  |  |
| **Abnormal blood glucose** | 0.460 | 0.728 | 0.313-1.692 |  |  |  |
| **Blood type** | 0.232 | 1.900 | 0.663-5.446 |  |  |  |
| **Size (cm)** | 0.381 | 1.074 | 0.915-1.261 |  |  |  |
| **Differentiation** | 0.554 | 1.239 | 0.610-2.514 |  |  |  |
| **Blood vessel invasion** | 0.849 | 0.933 | 0.454-1.914 |  |  |  |
| **Tumor invasion** | 0.204 | 1.601 | 0.774-3.311 |  |  |  |
| **Lymph node metastasis** | 0.769 | 0.898 | 0.437-1.844 |  |  |  |
| **Metastasis** | ＜0.001 | 261.289 | 35.597-1917.937 |  |  |  |
| **Tumor stage** | ＜0.001 | 8.575 | 3.946-18.635 | ＜0.001 | 8.689 | 3.986-18.943 |
| **CD26 level** | 0.205 | 1.643 | 0.763-3.540 | 0.215 | 1.637 | 0.751-3.568 |

**Table S6. Cox proportional hazard regression model analysis of overall survival in PDAC patients**

| **Characteristics** | Univariate analysis | | | Multivariate analysis | | |
| --- | --- | --- | --- | --- | --- | --- |
| *P* value | Hazard Ratio | 95% confidence interval | *P* value | Hazard Ratio | 95% confidence interval |
| **Gender** | 0.235 | 0.743 | 0.446-1.236 |  |  |  |
| **Age (years)** | 0.317 | 1.014 | 0.987-1.041 |  |  |  |
| **Smoking** | 0.889 | 1.039 | 0.608-1.775 |  |  |  |
| **Drinking** | 0.061 | 0.545 | 0.290-1.028 |  |  |  |
| **Abnormal blood glucose** | 0.691 | 1.119 | 0.642-1.949 |  |  |  |
| **Blood type** | 0.934 | 1.026 | 0.563-1.869 |  |  |  |
| **Size (cm)** | 0.425 | 1.047 | 0.935-1.174 |  |  |  |
| **Differentiation** | 0.915 | 1.028 | 0.617-1.714 |  |  |  |
| **Blood vessel invasion** | 0.966 | 1.011 | 0.606-1.686 |  |  |  |
| **Tumor invasion** | 0.310 | 1.314 | 0.778-2.228 |  |  |  |
| **Lymph node metastasis** | 0.393 | 1.256 | 0.744-2.120 |  |  |  |
| **Metastasis** | ＜0.001 | 6.553 | 2.906-14.780 |  |  |  |
| **Tumor stage** | ＜0.001 | 3.013 | 1.693-5.361 | ＜0.001 | 3.398 | 1.879-6.145 |
| **CD26 level** | 0.025 | 1.862 | 1.082-3.206 | 0.008 | 2.117 | 1.214 -3.691 |


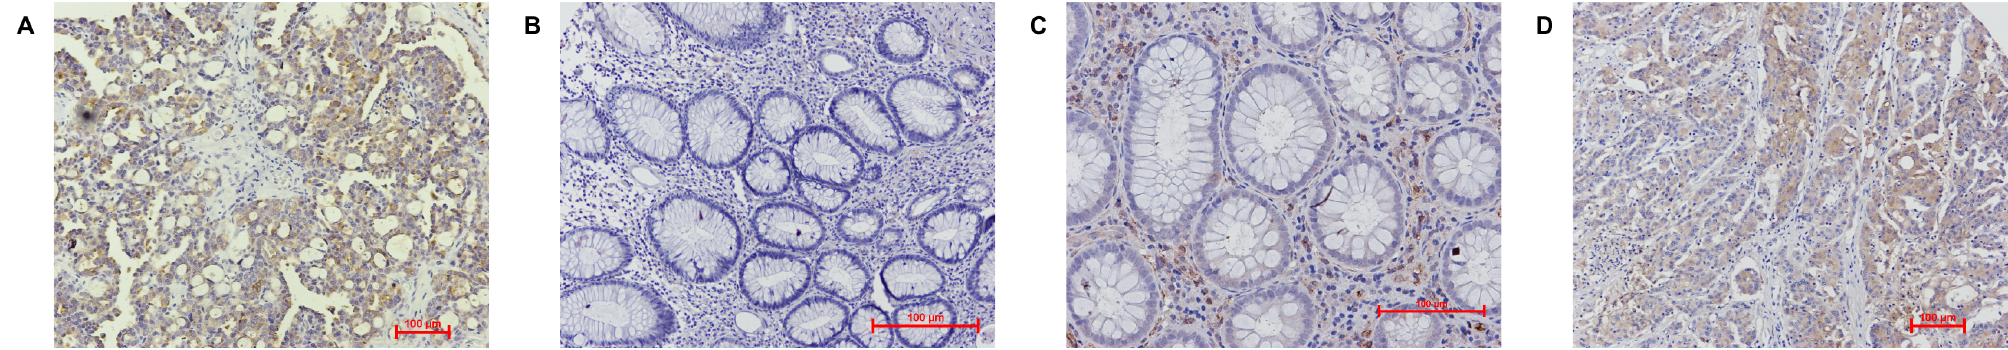


**Figure S1.** The validity of anti-CD26 antibody was verified in (A) epithelial ovarian cancer, (B) paratumoral colorectal mucous tissue, (C) colorectal adenocarcinoma tissue and (D) colorectal cancer tissue. The typical staining was located in cytoplasm of tumor cells. The magnification was ×100.


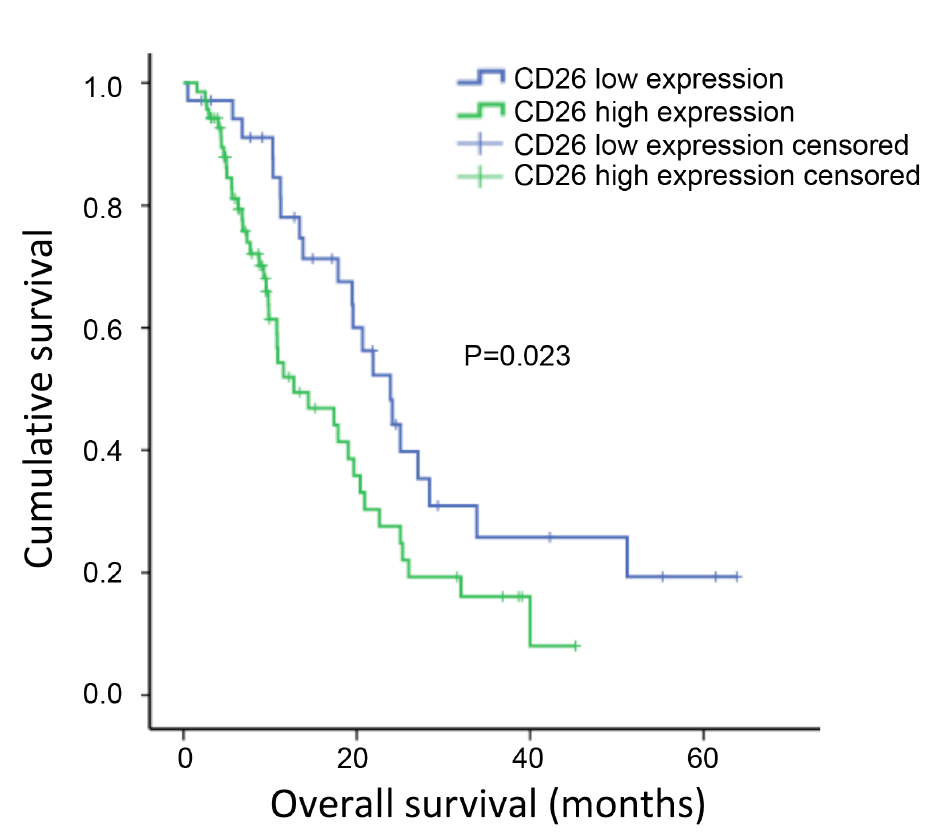


**Figure S2.** Higher CD26 expression was correlated with poorer OS in PDAC patients. Kaplan-Meier survival analysis according to CD26 expression level in PDAC patients showed that patients with lower CD26 expression had a favorable overall survival (29.37±3.93 months) than those with higher CD26 expression (17.93±1.96 months) (P=0.023).


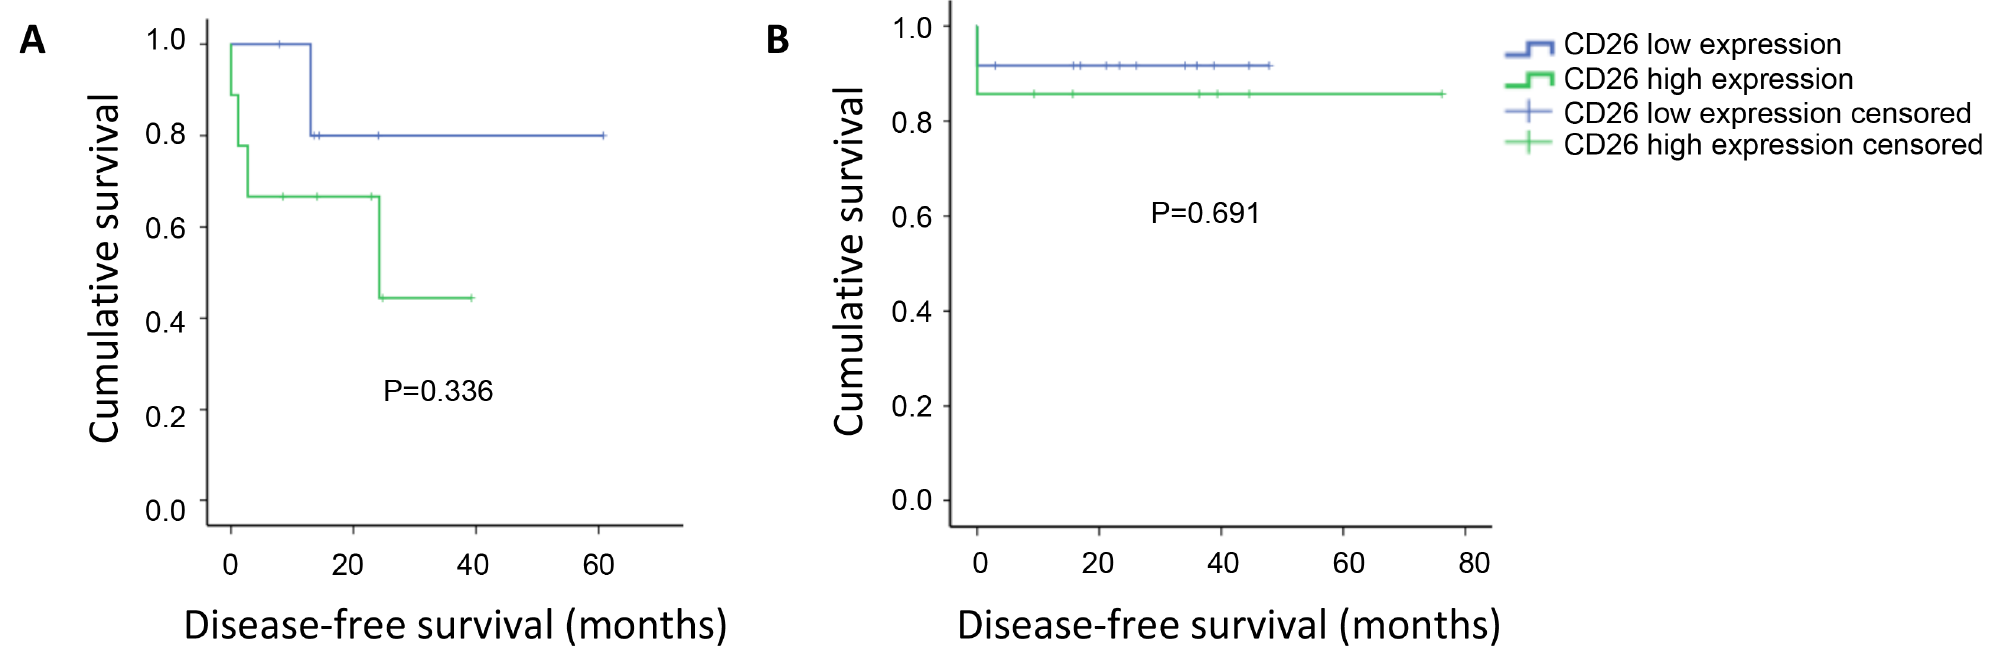


**Figure S3.** Kaplan-Meier survival analysis of (A) NETs and (B) SPTs patients. According to CD26 expression level, patients were divided into high expression group and low expression group. Kaplan-Meier survival analysis and log-rank test showed that patients with lower expression of CD26 had a better disease-free survival, yet not statistically significant due to the small sample size (P=0.336 & P=0.691).


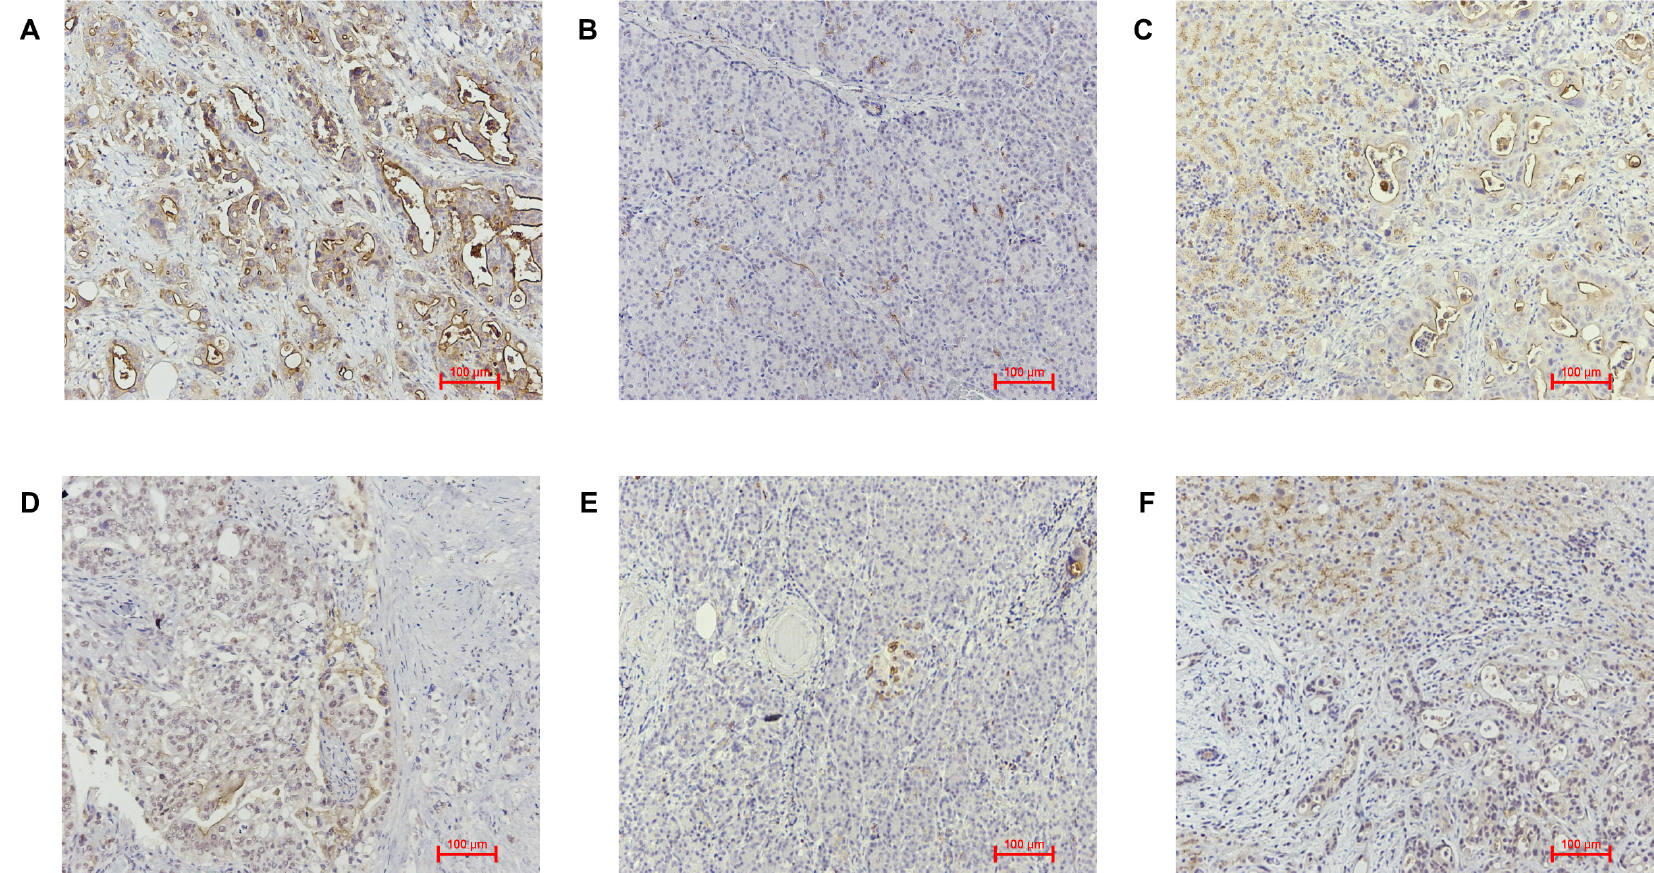


**Figure S4.** Typical staining of CD26 in pancreatic cancer (A & D), paired noncancerous tissue (B & E) and liver metastatic specimens (C & F) of two cases (image A, B and C were from one pancreatic cancer patient, and image D, E and F came from another pancreatic cancer patient). The magnification was ×100.
